# Supplementary material
Source: PubMed Central journal article supplement (PMC6021760)
Supplement: NIHMS974938-supplement-Supporting_Information.pdf [file NIHMS974938-supplement-Supporting_Information.pdf]

## Supporting Information:

### Comparison of Quantitative Mass Spectrometry Platforms for Monitoring Kinase ATP Probe Uptake in Lung Cancer

Melissa A. Hoffman†,§, Bin Fang†, Eric B. Haura†, Uwe Rix†, John M. Koomen†\*

†H. Lee Moffitt Cancer Center & Research Institute, Tampa, Florida 33612-9497, United States

§Cancer Biology Ph.D. Program, University of South Florida, Tampa, Florida 33620, United States

#### Table of Contents

- **Figure S1.** Workflow diagram of sample preparation for the method comparison study.
- **Figure S2.** Retention time stability and ion signal consistency assessed as quality control metrics.
- **Figure S3.** Comparison of retention time (RT) correlation and peptide coverage across all quantitative methods.
- **Figure S4.** Kinases downregulated by Erlotinib in each quantitative method.
- **Figure S5.** Kinases downregulated by Dasatinib in each quantitative method.
- **Figure S6.** DIA quantifies inhibition of STRAA\_HUMAN probe labeling after Dasatinib treatment.
- **Figure S7.** Assessment of signal reliability and relative LOD/LOQ in LC-MRM, LC-PRM, and DIA LC-MS/MS quantification using a dilution series.
- **Figure S8.** PRM directs fragment ion selection for MRM assay development.
- **Figure S9.** Kinases downregulated by Crizotinib across three quantitative platforms.
- **Figure S10.** Kinases differentially regulated by BEZ-235 in each quantitative method.
  
- **Table S1.** MRM Transition List for TSQ Quantiva (Thermo)
- **Table S2.** DIA Acquisition Method for Q Exactive Plus (Thermo)
- **Table S3.** PRM Precursor Isolation List for Q Exactive (Thermo)
- **Table S4.** DDA Retention Times (Kinase\_Peptide\_Treatment)
- **Table S5.** DIA Retention Times (Protein\_Peptide\_Treatment)
- **Table S6.** MRM Average Retention Times (averaged across all observed peaks, n = 18)
- **Table S7.** PRM Average Retention Times (averaged across all observed peaks, n = 18)
- **Table S8.** MaxQuant Scores and Raw Peak Areas for Peptides from Kinases Only for DDA Analysis
- **Table S9.** DDA analysis of H1993 cells treated with Crizotinib: Log2FC, Average, Standard Deviation, N, and Standard Error
- **Table S10.** DDA analysis of H1993 cell lysate treated with Erlotinib: Log2FC, Average, Standard Deviation, N, and Standard Error

- **Table S11.** DDA analysis of H1993 cell lysate treated with Dasatinib: Log2FC, Average, Standard Deviation, N, and Standard Error
- **Table S12.** DDA analysis of H1993 cells treated with BEZ-235: Log2FC, Average, Standard Deviation, N, and Standard Error
- **Table S13.** Pinnacle Scores and Raw Peak Areas for Peptides from Kinases Only for DIA Analysis.
- **Table S14.** DIA analysis of H1993 cells treated with Crizotinib: Log2FC, Average, Standard Deviation, N, and Standard Error
- **Table S15.** DIA analysis of H1993 cell lysate treated with Erlotinib: Log2FC, Average, Standard Deviation, N, Standard Error, and Statistical Calculations
- **Table S16.** DIA analysis of H1993 cell lysate treated with Dasatinib: Log2FC, Average, Standard Deviation, N, Standard Error, and Statistical Calculations
- **Table S17.** DIA analysis of H1993 cells treated with BEZ-235: Log2FC, Average, Standard Deviation, N, Standard Error, and Statistical Calculations
- **Table S18.** Raw Peak Areas from Skyline Output for Peptides from MRM Analysis.
- **Table S19.** MRM analysis of H1993 cells treated with Crizotinib: Log2FC, Average, Standard Deviation, N, and Standard Error
- **Table S20.** MRM analysis of H1993 cell lysate treated with Erlotinib: Log2FC, Average, Standard Deviation, N, Standard Error, and Statistical Calculations
- **Table S21.** MRM analysis of H1993 cell lysate treated with Dasatinib: Log2FC, Average, Standard Deviation, N, Standard Error, and Statistical Calculations
- **Table S22.** MRM analysis of H1993 cells treated with BEZ-235: Log2FC, Average, Standard Deviation, N, Standard Error, and Statistical Calculations
- **Table S23.** Raw Peak Areas from Skyline Output for Peptides from PRM Analysis
- **Table S24.** PRM analysis of H1993 cells treated with Crizotinib: Log2FC, Average, Standard Deviation, N, and Standard Error
- **Table S25.** PRM analysis of H1993 cell lysate treated with Erlotinib: Log2FC, Average, Standard Deviation, N, Standard Error, and Statistical Calculations
- **Table S26.** PRM analysis of H1993 cell lysate treated with Dasatinib: Log2FC, Average, Standard Deviation, N, Standard Error, and Statistical Calculations
- **Table S27.** PRM analysis of H1993 cells treated with BEZ-235: Log2FC, Average, Standard Deviation, N, Standard Error, and Statistical Calculations
- **Table S28.** PRM, MRM, and DIA analysis of serial diluted desthiobiotinylated peptides from untreated H1993 cells: Average Log2 Peak Areas, Standard Deviations, and Coefficient of Variations (CVs)
- **Table S29.** DIA GeneGo enrichment analysis report.
- **Table S30.** MRM GeneGo enrichment analysis report.
- **Table S31.** PRM GeneGO enrichment analysis report.
- **Table S32.** Combined GeneGo enrichment analysis p-values.

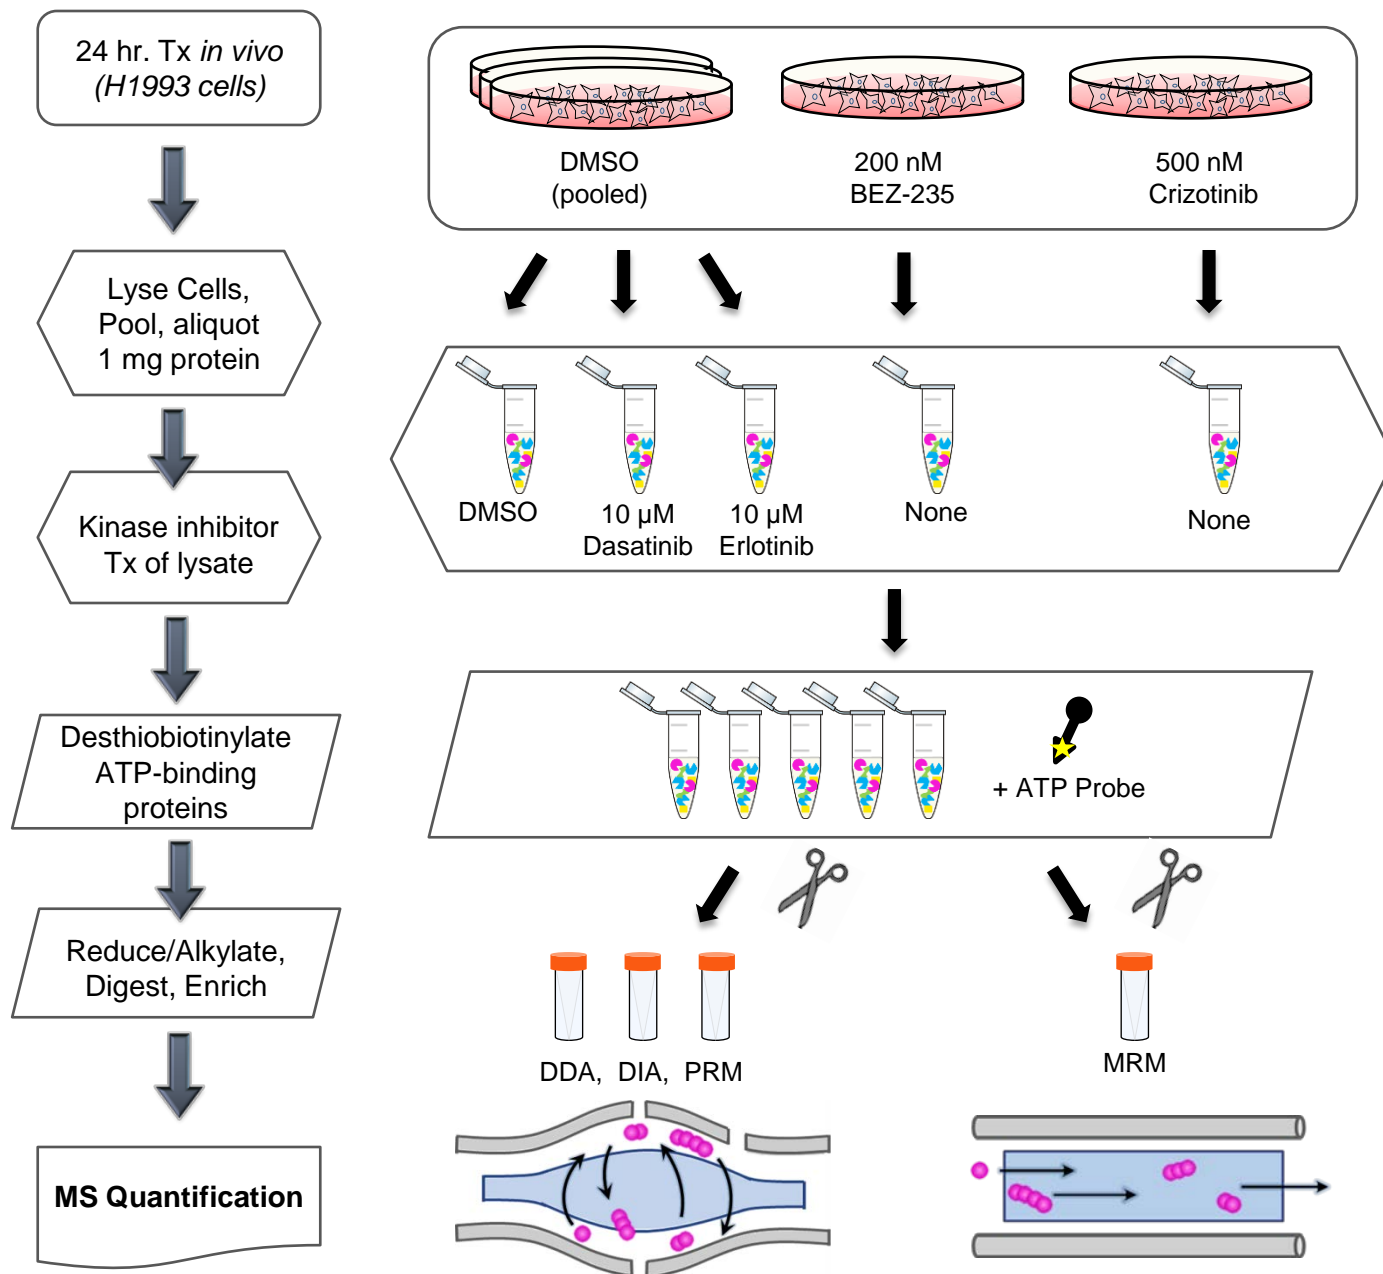

**Supplemental Figure 1. Workflow diagram of sample preparation for the method comparison study.**

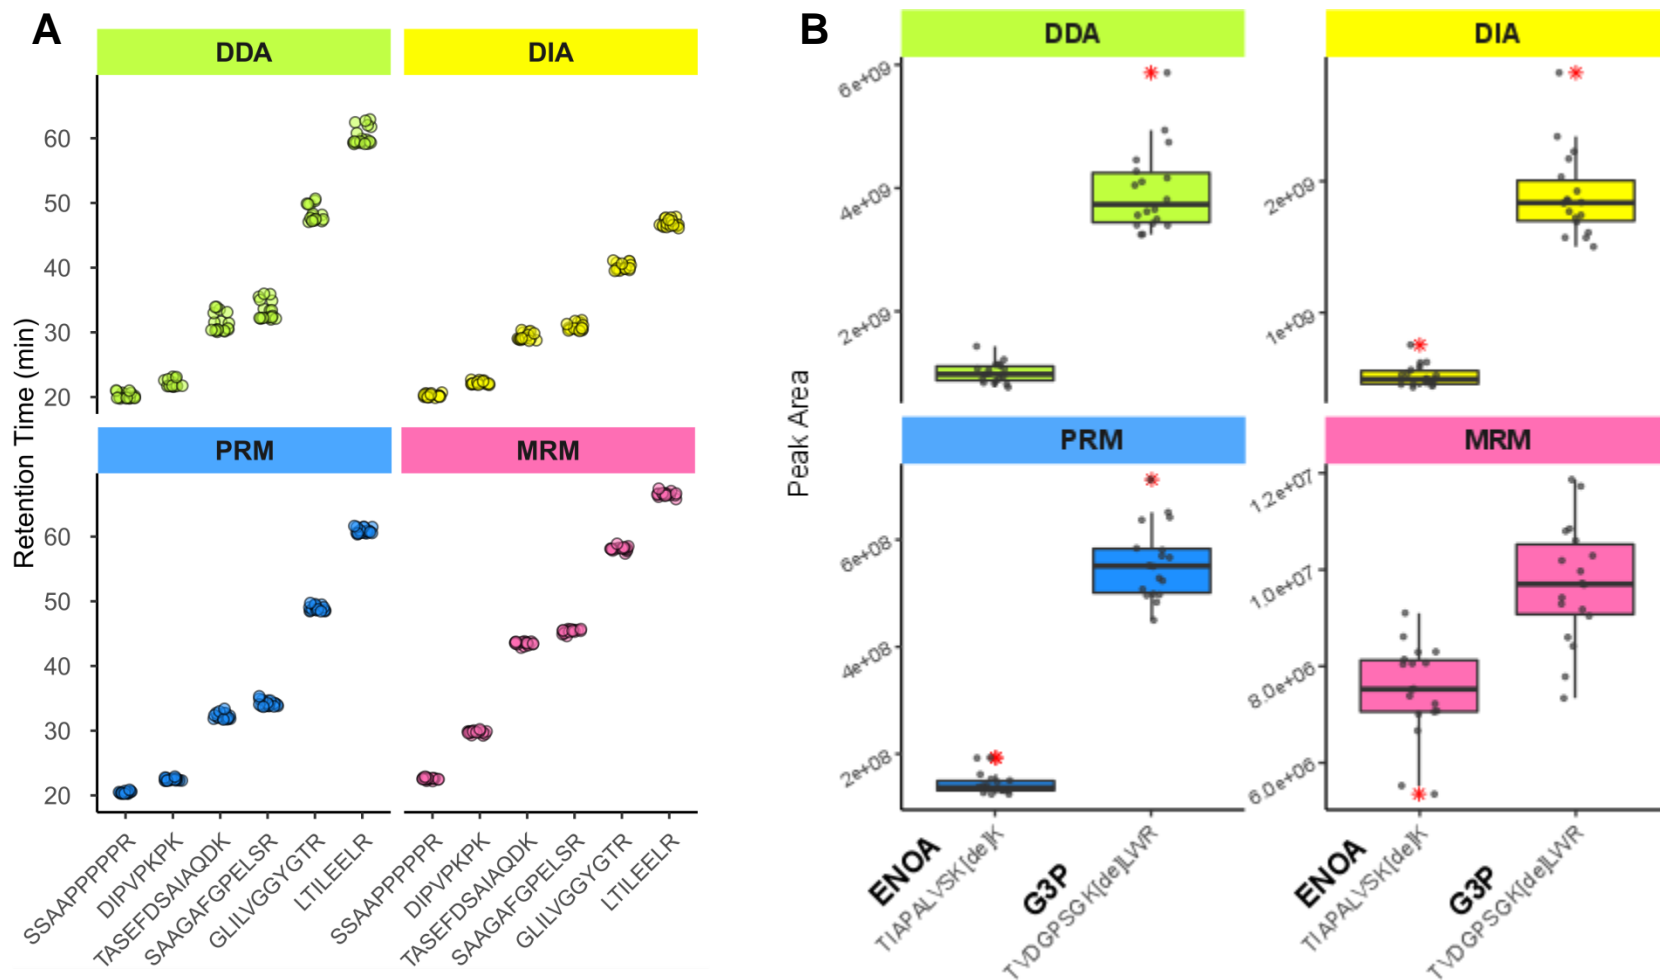

**Supplemental Figure 2. Retention time stability and ion signal consistency assessed as quality control metrics.**

(A) Pierce retention time calibrator (PRTC) peptides were monitored in each LC-MS run (5 fmol/ injection) for retention time stability across the entire cohort. (B) Peptides from ATP-utilizing metabolic proteins, ENOA and G3P, were quantified as a control for sample preparation and peptide enrichment consistency (n = 18).

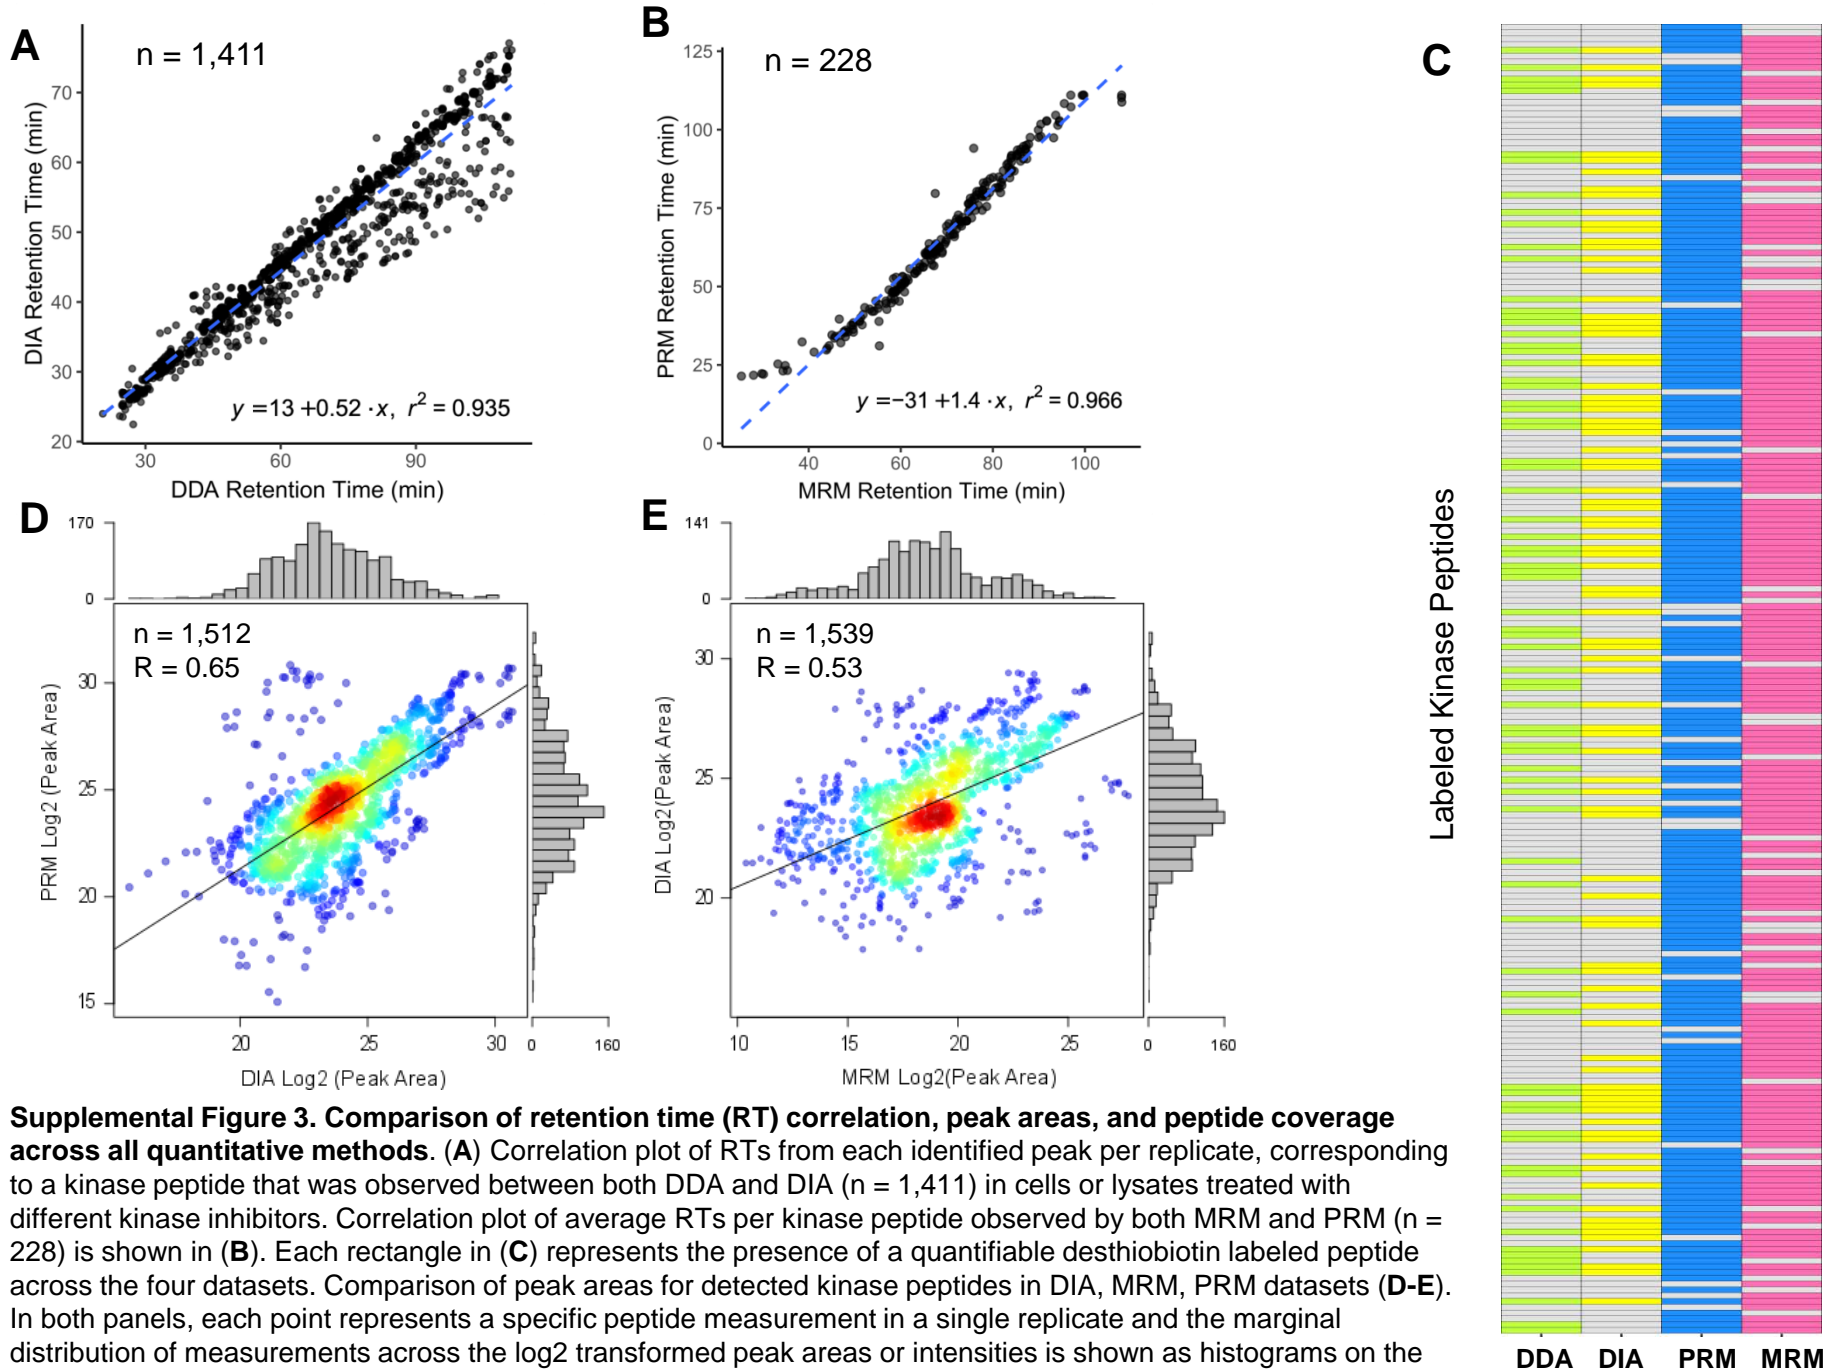

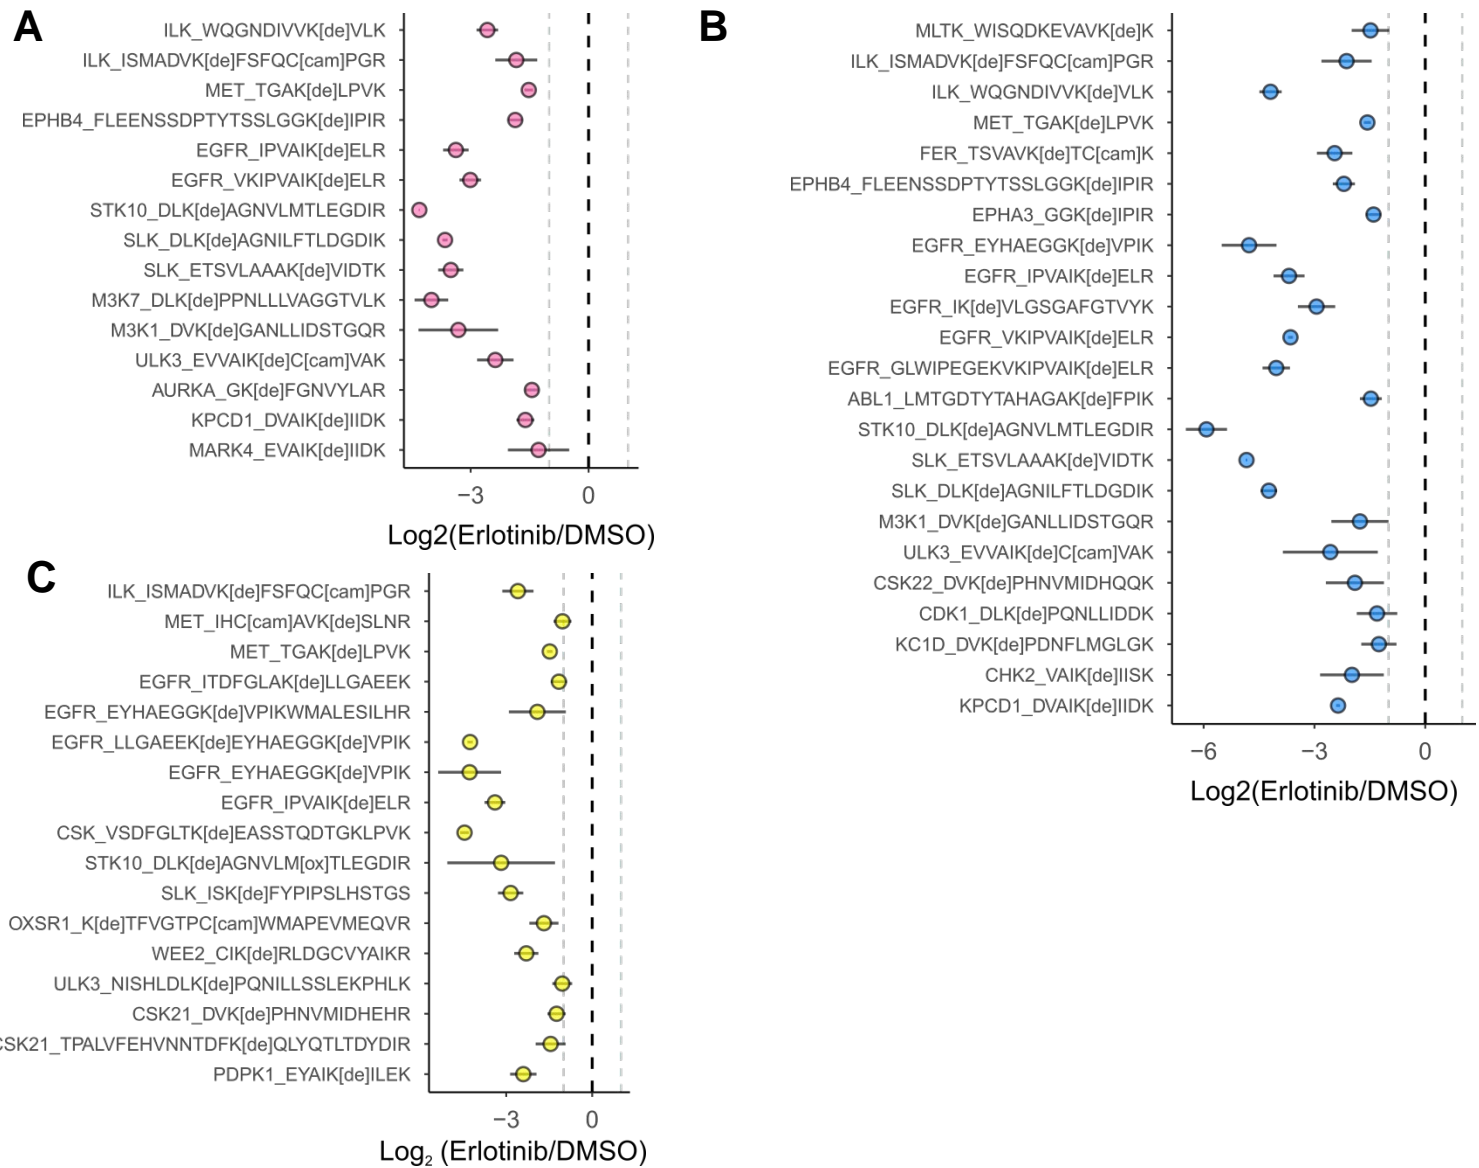

**Supplemental Figure 4. Kinases downregulated by Erlotinib in each quantitative method.** Desthiobiotin-labeled peptides downregulated following quantification by (A) MRM, (B) PRM, and (C) DIA, grouped by kinase family, are shown. Points represent the average  $\log_2(\text{fold change})$  with bars indicating 95% confidence intervals. All labelled peptides with an average  $\log_2(\text{fold change}) \leq -1$  and were significantly decreasing ( $p\text{-value} \leq 0.05$ , calculated using the student's one-tailed t-test).

**A**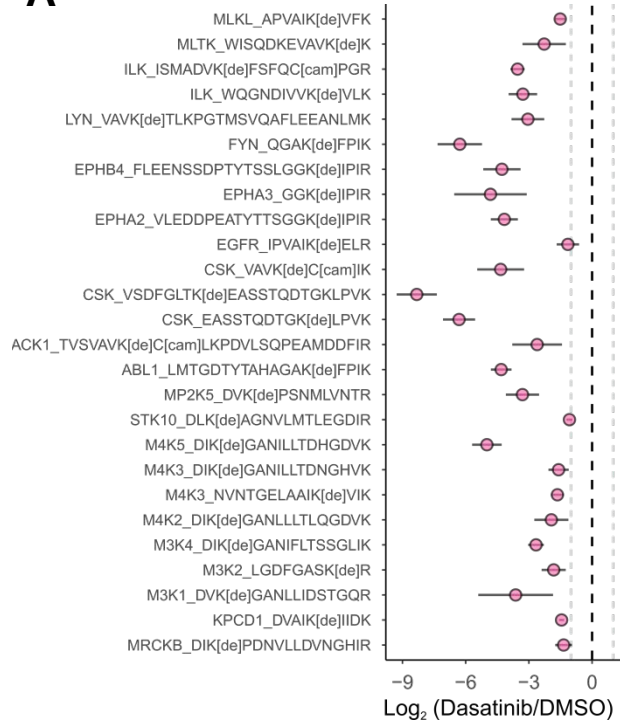**B**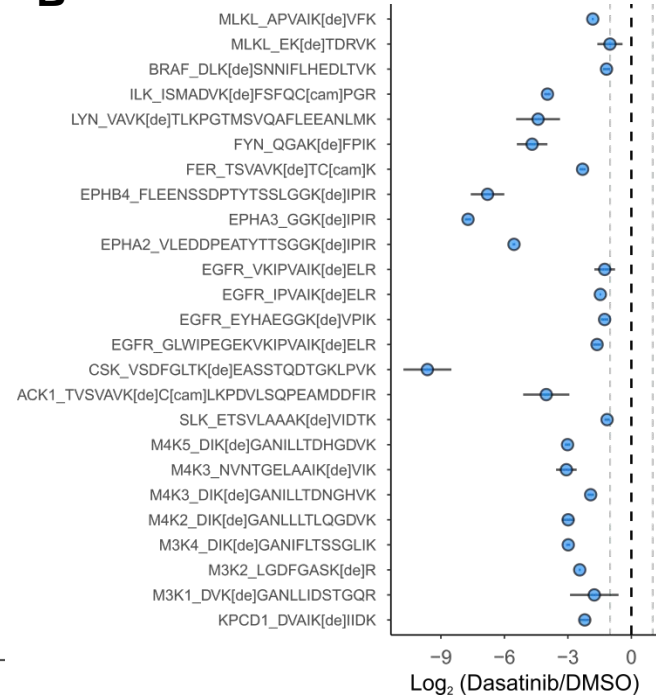**C**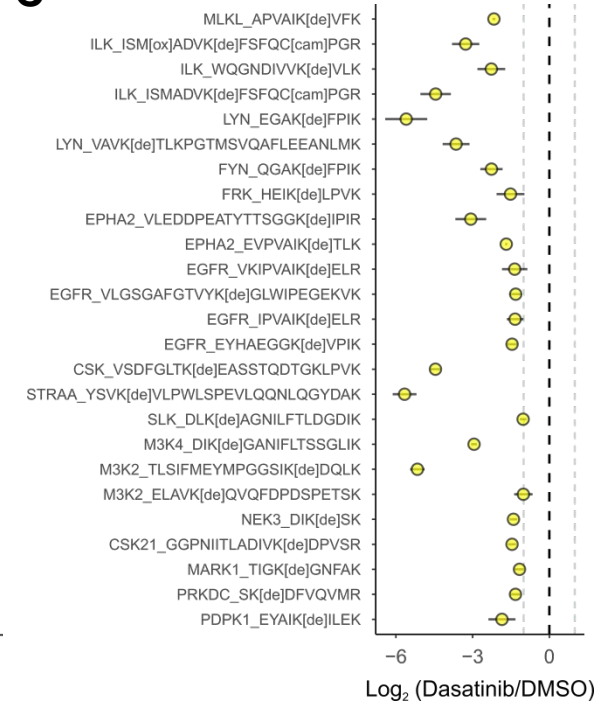

**Supplemental Figure 5. Kinases downregulated by Dasatinib in each quantitative method.** Desthiobiotin-labeled peptides downregulated following quantification by (A) MRM, (B) PRM, and (C) DIA, grouped by kinase family, are shown. Points represent the average  $\log_2$  (fold change) with bars indicating 95% confidence intervals. All labelled peptides with an average  $\log_2$  (fold change)  $\leq -1$  and were significantly decreasing ( $p$ -value  $\leq 0.05$ , calculated using the student's one-tailed t-test).

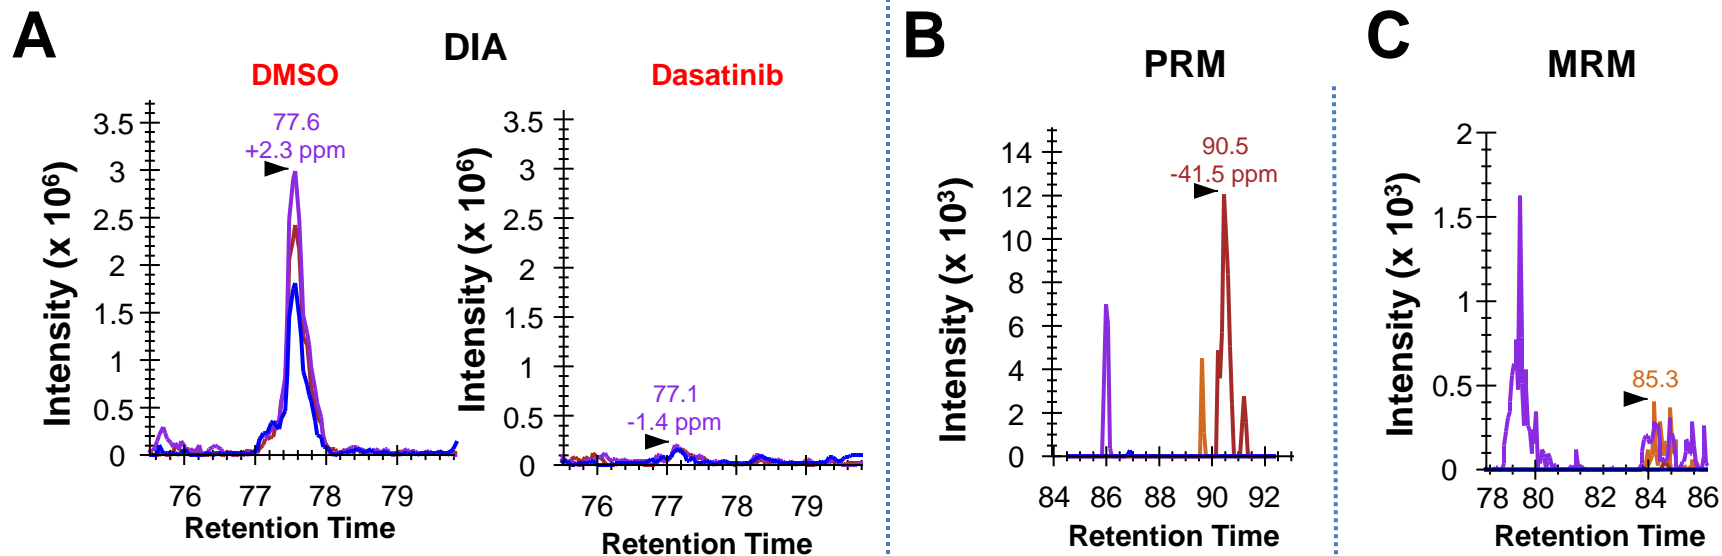

**Supplemental Figure 6. DIA quantifies inhibition of STRAA\_HUMAN probe labeling after Dasatinib treatment.** Example peaks for a peptide (YSVKVLPWLSPEVLQQNLQGYDAK) from the kinase adapter protein, STRAA\_HUMAN, are shown in control (DMSO) and Dasatinib treated lysates quantified by DIA (**A**). Example peaks (DMSO) from PRM (**B**), and MRM (**C**) datasets did not have quantifiable peaks in their scheduled time windows. DIA LC-MS/MS retains the ability to detect these peaks at the earlier retention time. All chromatograms were exported from Skyline.



**A**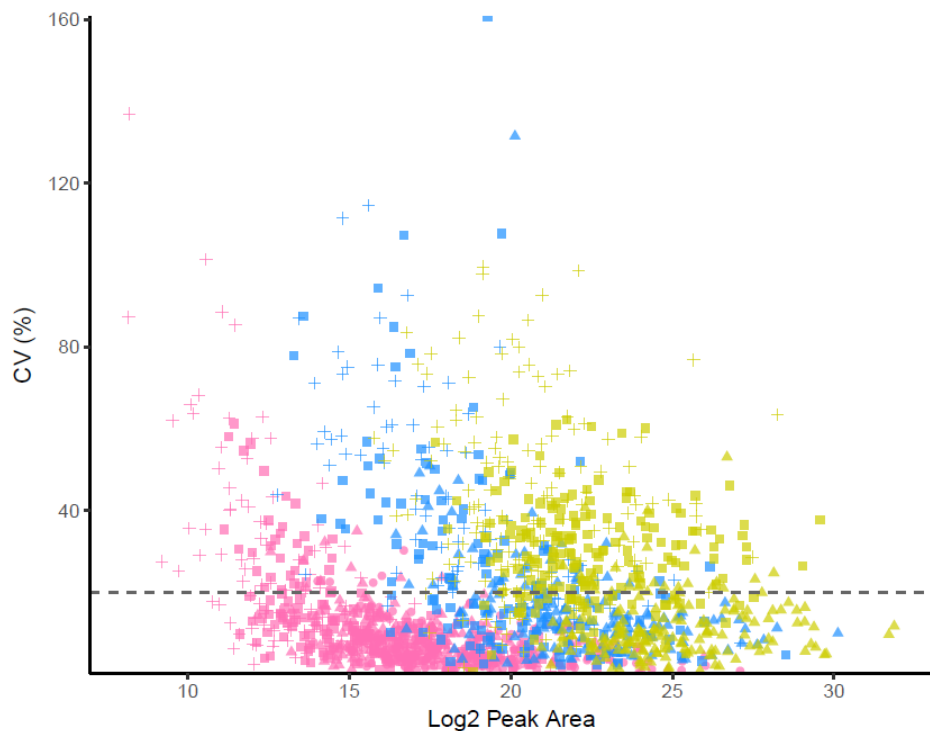**B**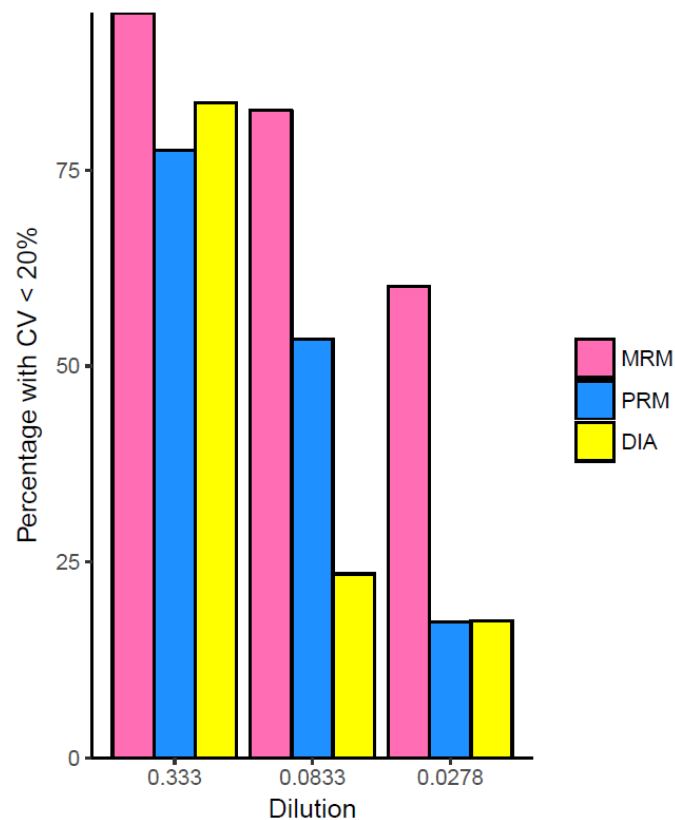**Supplementary Figure 7. Reproducibility assessment of MRM, PRM, and DIA quantification of a dilution series.**

A serial dilution of the desthiobiotinylated peptides was prepared from a single bulk sample and analyzed in triplicate by LC-MRM (pink), LC-PRM (blue), and LC-MS/MS with DIA (yellow). CV (%) is plotted against log<sub>2</sub> peak area values for all measurements (**A**), with an observable inverse relationship between log<sub>2</sub> peak area and CV. The dotted horizontal line indicates a 20% CV cut-off. The percentage of peptides that fall below the 20% CV cut-off across the three platforms is presented for each dilution (**B**).

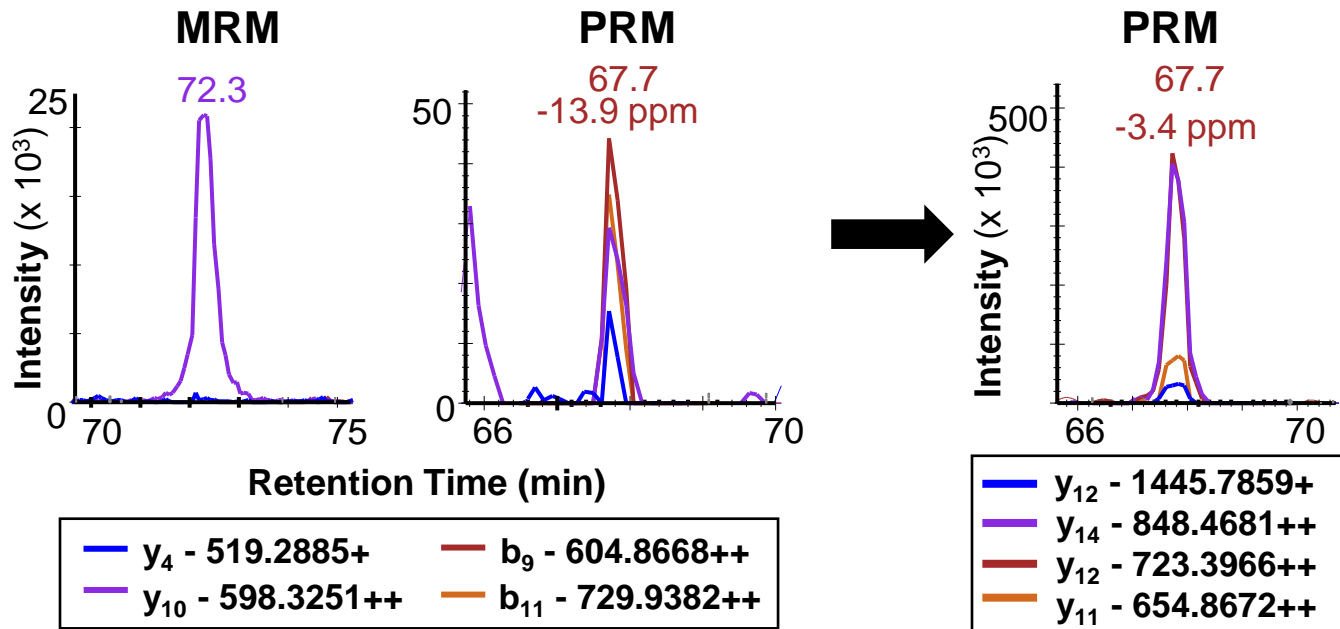

**Supplementary Figure 8. PRM directs fragment ion selection for MRM assay development.** Shown is an example of MRM method refinement using PRM for VQVAVKH<sub>L</sub>H<sub>I</sub>H<sub>T</sub>P<sub>L</sub>L<sub>D</sub>S<sub>E</sub>R<sub>K</sub> from RIPK2. Fragment selection for MRM was created previously from ion trap MS/MS data and appears to be an incorrect match based on the error (-13.9 ppm) in the PRM data. Because all fragments are monitored by PRM, their selection can be changed to improve quantitation. Chromatograms were exported from Skyline.

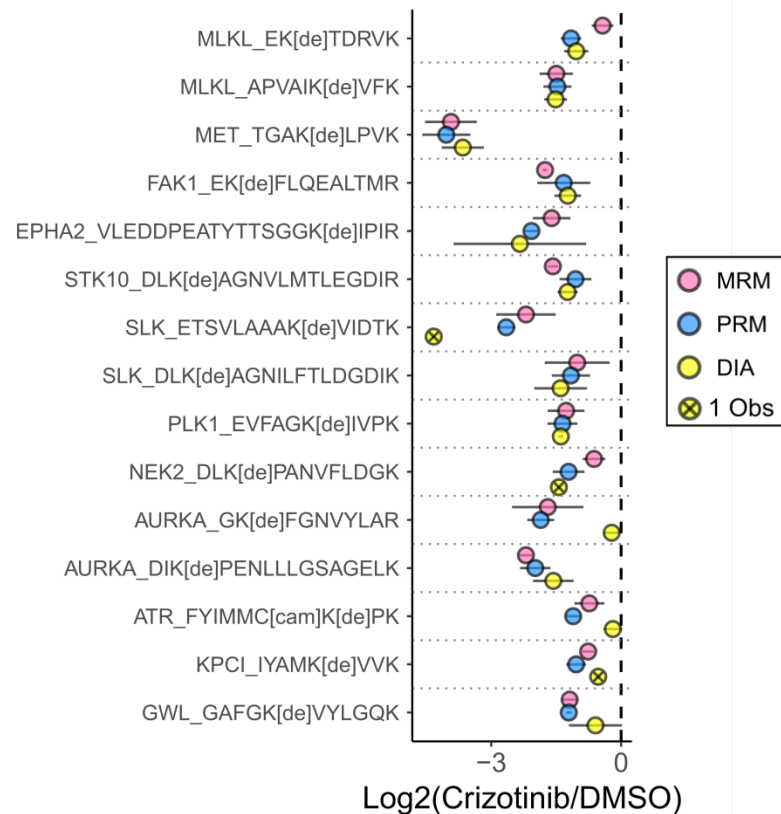

**Supplemental Figure 9. Kinases downregulated by Crizotinib across three quantitative platforms.** Desthiobiotin-labeled peptides downregulated following quantification by MRM, PRM, and DIA, are shown. Points represent the average  $\log_2$ (fold change) with bars indicating 95% confidence intervals. All labelled peptides with an average  $\log_2$ (fold change)  $\leq -1$  and were significantly decreasing (p-value  $\leq 0.05$ , calculated using the student's one-tailed t-test).

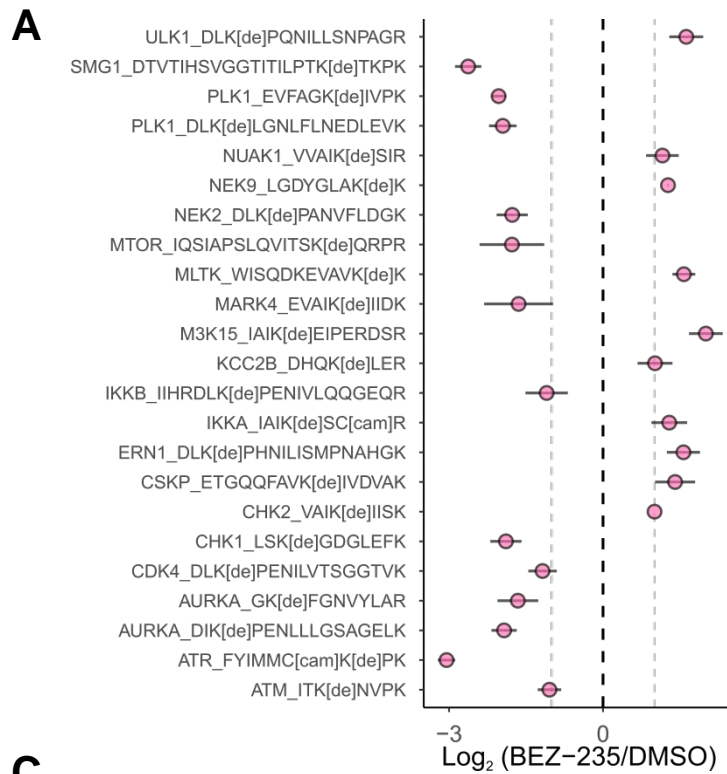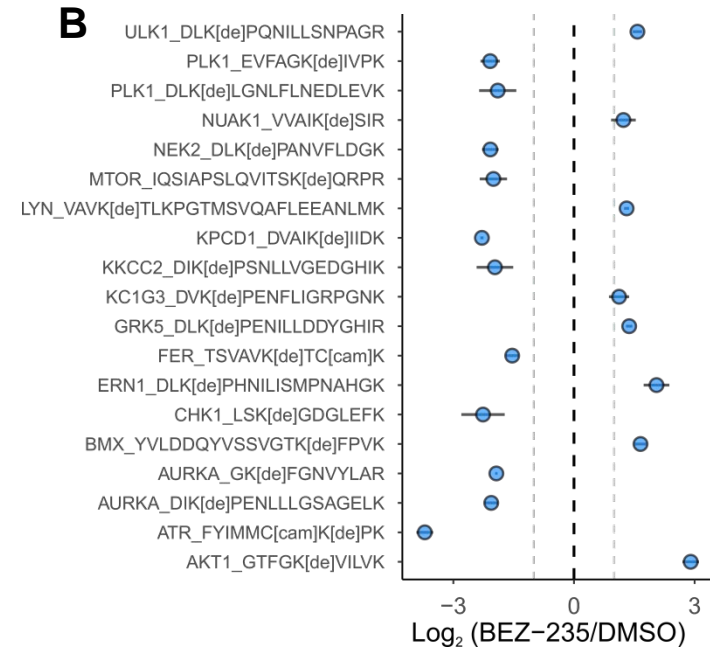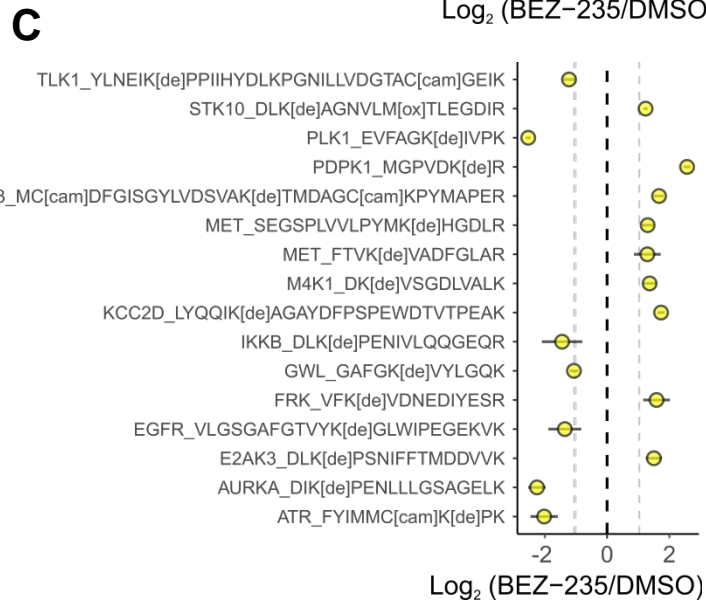

**Supplemental Figure 10. Kinases differentially regulated by BEZ-235 in each quantitative method.** Desthiobiotin-labeled peptides increasing or decreasing following quantification by MRM (A), PRM (B), and DIA (C) are shown grouped by kinase family. Points represent the average log<sub>2</sub>(fold change) with bars indicating 95% confidence intervals. All labeled peptides with an average log<sub>2</sub>(fold change) ≤ -1 or ≥ 1 and were significantly different (p-value ≤ 0.05, calculated using the student's two-tailed t-test).
